# Supplementary material for: Deep Eutectic Solvents as New Reaction Media to Produce Alkyl-Glycosides Using Alpha-Amylase from Thermotoga maritima
Source: MDPI journal article supplement (doi:10.3390/ijms20215439), 2019-10-31
Supplement: s1 [file s1]

## Supplementary Information

**Table S1.** Deep eutectic solvents prepared in this work.

| #                          | DES                                           | Mol ratio <sup>1</sup> | T <sub>m</sub> °C <sup>1</sup> | Method of preparation <sup>1</sup> |
|----------------------------|-----------------------------------------------|------------------------|--------------------------------|------------------------------------|
| <b>Amides</b>              |                                               |                        |                                |                                    |
| 1                          | Choline chloride : urea                       | 1 : 2                  | 12                             | Heating under vacuum               |
| 2                          | Choline chloride : methyl urea                | 1 : 2                  | 29                             | Heating under vacuum               |
| <b>Acids</b>               |                                               |                        |                                |                                    |
| 3                          | Choline chloride : malonic acid               | 1 : 1                  | 10                             | Heating                            |
| 4                          | Choline chloride : levulinic acid             | 1 : 2                  | RT                             | Heating                            |
| <b>Alcohols</b>            |                                               |                        |                                |                                    |
| 5                          | Choline chloride : ethylene glycol            | 1 : 2                  | -10                            | Heating                            |
| 6                          | Choline chloride : D-isosorbide               | 1 : 2                  | RT                             | Heating                            |
| 7                          | Methytriphenylphosphoniumbromid : glycerol    | 1 : 2                  | 26                             | Heating                            |
| 8                          | Choline chloride : glycerol                   | 1 : 3 o 1 : 2          | -20                            | Heating                            |
| 9                          | Choline chloride : benzyl alcohol             | 1 : 2                  | RT                             | Heating                            |
| <b>Natural DES (NADES)</b> |                                               |                        |                                |                                    |
| 10                         | Choline chloride : 1,3-propanediol : water    | 1 : 1 : 1              | -110                           | Heating up to 50 °C (no vacuum)    |
| 11                         | Choline chloride : sucrose : H <sub>2</sub> O | 4 : 1 : 4              | -83                            | Heating                            |
| 12                         | Choline chloride : glucose : H <sub>2</sub> O | 5 : 2 : 5              | -84                            | Heating                            |

<sup>1</sup>The molar ratio is given as well as the melting point of the eutectic mixture if known. The solvents were prepared by the method indicated.

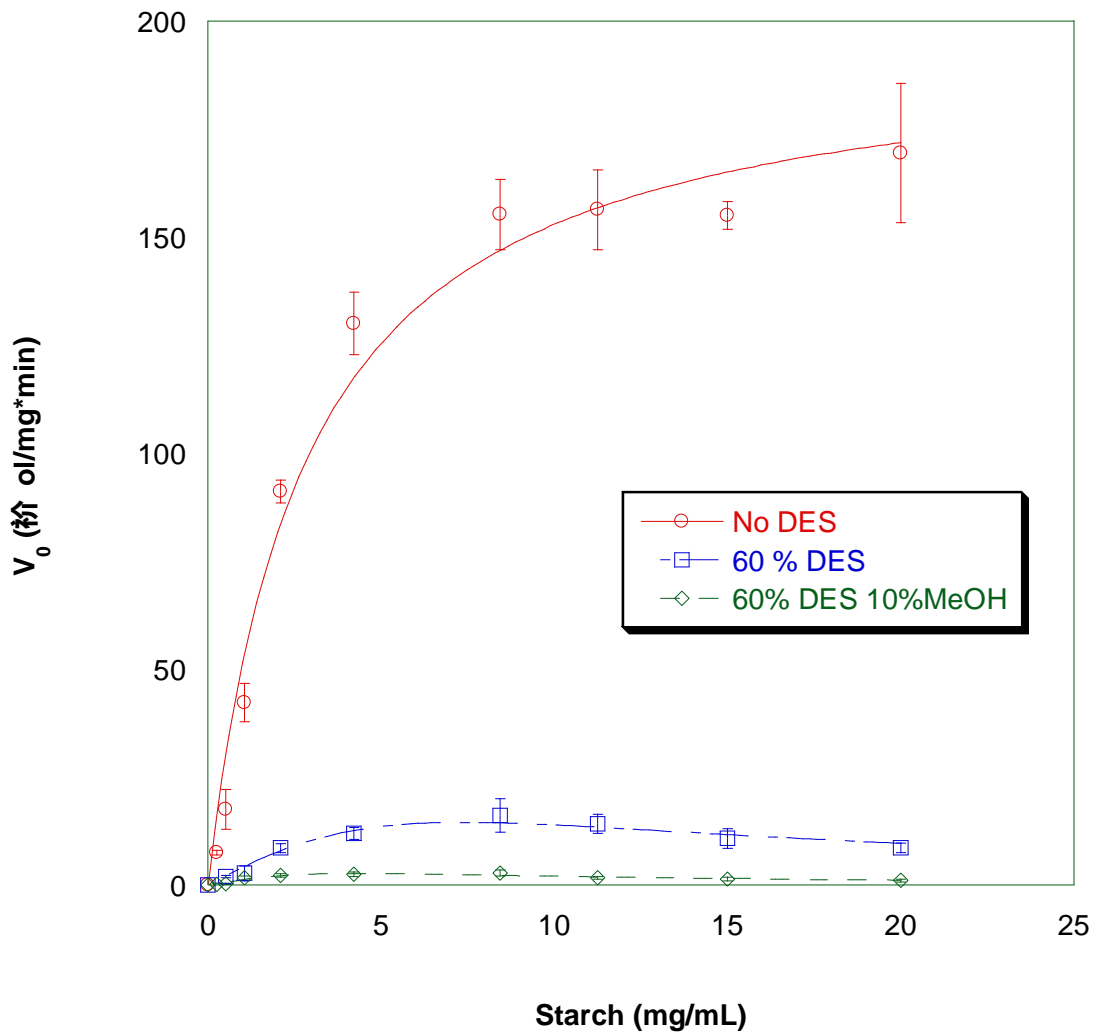

**Figure S1.** Non-linear curve fitting to Michaelis-Menten or inhibition product equations. Initial velocities ( $\mu\text{mol/mg}\cdot\text{min}$ ) were plotted against increasing concentrations of starch ( $\text{mg/mL}$ ). In the case of the reactions carried out in DES, viscosity became a limiting factor at high starch concentrations. Error bars correspond to standard deviation of triplicates.

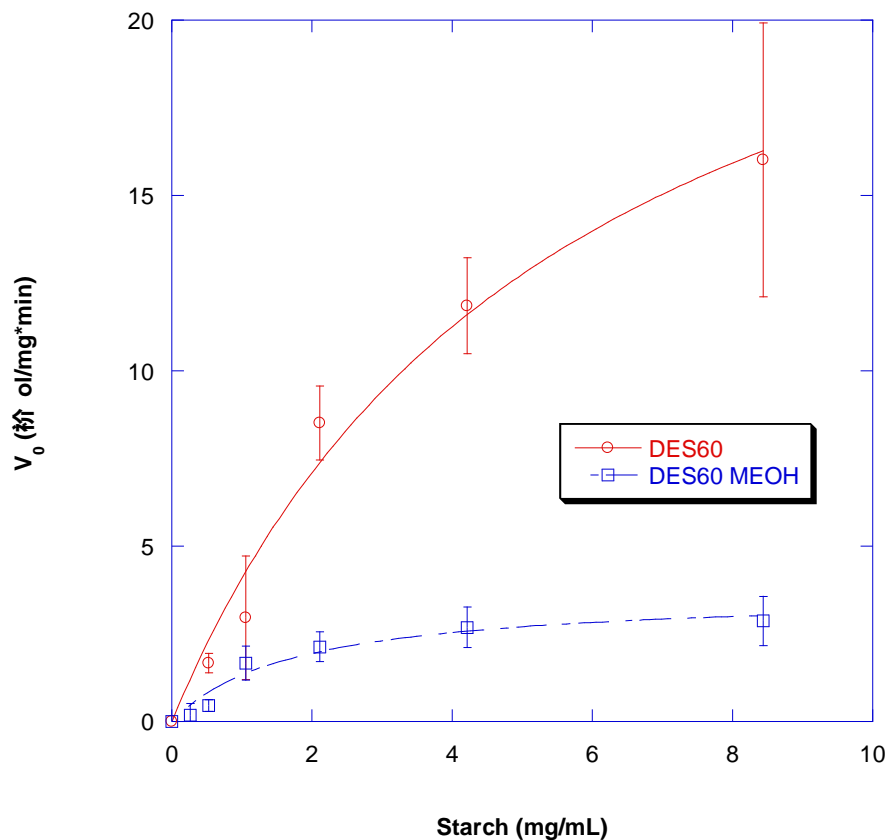

**Figure S2.** Initial velocities vs Starch concentration in DES and DES:MeOH medium. Since viscosity became a limiting factor, data at starch concentrations above 8  $\text{mg}/\text{mL}$  were discarded, and the remaining data were fit to the Michaelis-Menten equation. Error bars correspond to standard deviation of triplicates.

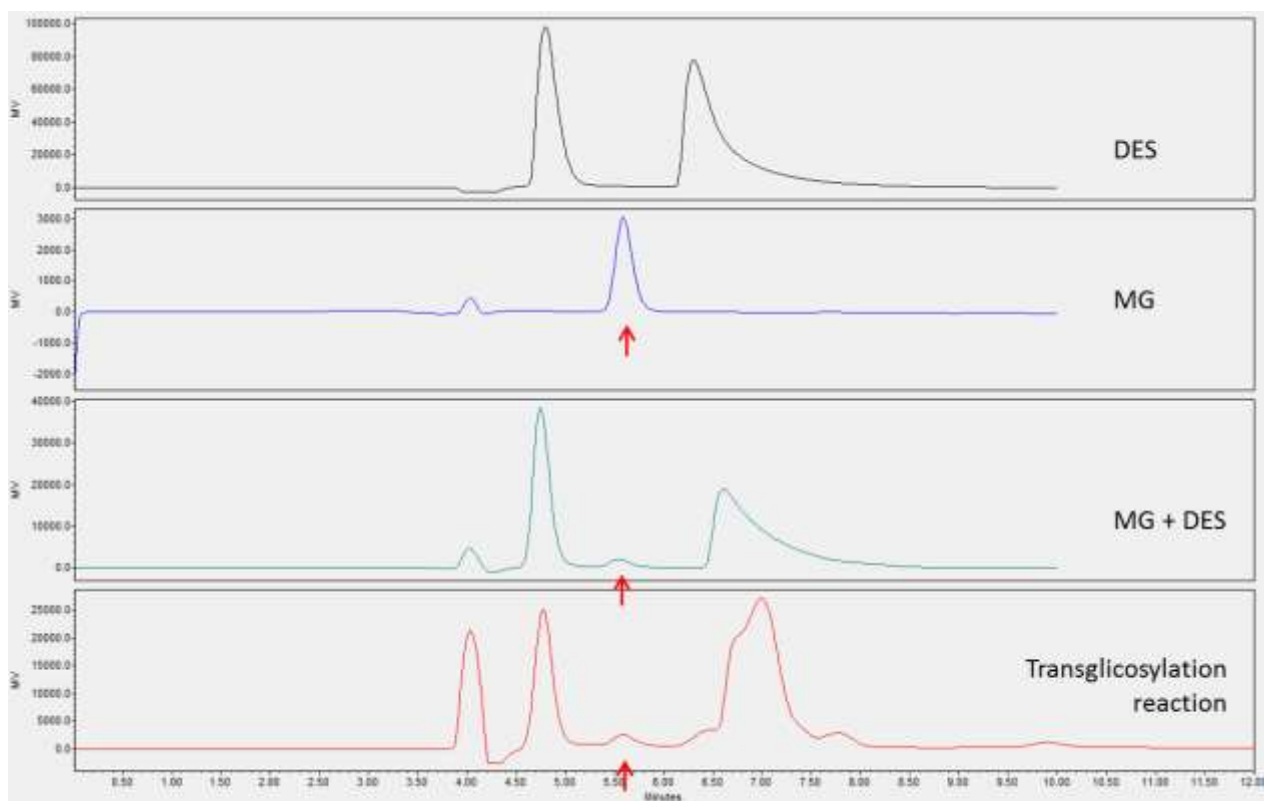

**Figure S3.** Chromatographic profile of standards and alcoholysis reaction products. In black, 80% DES; in blue, methyl glucoside (MG) directly dissolved in mobile phase (ACN:H<sub>2</sub>O, 80:20); in dark green, MG dissolved in 40% DES; in red, alcoholysis reaction products (includes a mixture of dextrans, glucose, methanol, DES and MG). Samples from reactions were previously diluted 1:1 with buffer and digested for 6 h with glucoamilase from *A. niger* to hydrolyze remaining amylose. After digestion, samples were filter through a 0.22  $\mu$ m nylon membrane and injected into a Gold-amino column. The red arrow shows the peak corresponding to the product of interest MG to be quantified.
